# Supplementary material
Source: publisher figshare collection journal article supplement (https://sage.figshare.com/ndownloader/files/13894355)
Supplement: Supplementary file 1 [file 13894355]

data {
	// N: number of cases
	int<lower=1> N ;
	// K: number of outcomes
	int<lower=1> K ;
	// Y: matrix of outcomes for each case & variable
	matrix[N,K] Y ;
	// n_truly_missing: number of instances of truly-missing data
	int n_truly_missing ;
	// indices_of_truly_missing: matrix of the row and column indices of missing data
	int indices_of_truly_missing[n_truly_missing,2] ;
	
	int n_truncated_at_10 ;
	int indices_of_truncated_at_10[n_truncated_at_10,2] ;
	
	int n_truncated_at_50 ;
	int indices_of_truncated_at_50[n_truncated_at_50,2] ;
	
	int MP1rs_col ;
	int MP1cs_col ;
	int PLS1ass_col ;
	int age_col ;
}
parameters {
	vector[6] betas ;
	vector[2] intercepts ;
	vector<lower=0>[2] sigmas ;
	// means: vector of population-level means for intercept & slope
	vector[K] means ;
	// sds: vector of population-level sds for intercept & slope
	vector<lower=0>[K] sds ;
	// cor: population-level correlation between intercept & slope
	corr_matrix[K] cor ;
	// imputed: vector of imputed values for truly missing observations
	vector[n_truly_missing] imputed ;
	vector<upper=10>[n_truncated_at_10] imputed10 ;
	vector<upper=50>[n_truncated_at_50] imputed50 ;
	
	real mp1ds_mean ;
	real<lower=0> mp1ds_sd ;
	
	real diff_mean ;
	real<lower=0> diff_sd ;
	
}
transformed parameters{
	# cov: covariance matrix (derived from cor & sds)
	matrix[K,K] cov ; #used in getting correlation to work
	matrix[N,K] Y_with_imputed ;
	#compute covariance matrix from cor & sds
	cov = quad_form_diag(cor,sds) ;
	Y_with_imputed = Y ;
	for(i in 1:n_truly_missing){
		Y_with_imputed[indices_of_truly_missing[i][1],indices_of_truly_missing[i][2]] = imputed[i] ;
	}
	for(i in 1:n_truncated_at_10){
		Y_with_imputed[indices_of_truncated_at_10[i][1],indices_of_truncated_at_10[i][2]] = imputed10[i] ;
	}
	for(i in 1:n_truncated_at_50){
		Y_with_imputed[indices_of_truncated_at_50[i][1],indices_of_truncated_at_50[i][2]] = imputed50[i] ;
	}
}
model {
	
	//priors on population parameters; presumes data has been scale()ed
	means ~ normal(100,1000) ;
	sds ~ normal(0,100) ;
	cor ~ lkj_corr(1) ;
	imputed ~  normal(100,1000) ;
	imputed10 ~  normal(100,1000) ;
	imputed50 ~  normal(100,1000) ;
	mp1ds_mean ~ normal(100,1000) ;
	mp1ds_sd ~ normal(0,100) ;
	diff_mean ~ normal(0,1000) ;
	diff_sd ~ normal(0,100) ;
	
	sigmas ~ normal(0,100) ;
	intercepts ~ normal(0,1000) ;
	betas ~ normal(0,100) ;
	
	//assert sampling of case-level outcomes on each variable given multivariate normal population
	for(ni in 1:N){
		real MP1ds = sum(Y_with_imputed[ni,2:7])/6 ;
		MP1ds ~ normal(mp1ds_mean,mp1ds_sd) ;
		Y_with_imputed[ni,] ~ multi_normal(means,cov) ;
		//MP1rs ~ PLS1ass * MP1ds
		Y_with_imputed[ni,MP1rs_col] ~ normal(
			intercepts[1] +
				betas[1]*Y_with_imputed[ni,PLS1ass_col] + 
				betas[2]*MP1ds +
				betas[3]*Y_with_imputed[ni,PLS1ass_col]*MP1ds
			, sigmas[1]
		);
		//(MP1rs - MP1cs) ~ Age * MP1ds
		Y_with_imputed[ni,MP1rs_col] - Y_with_imputed[ni,MP1cs_col] ~ normal(diff_mean,diff_sd);
		Y_with_imputed[ni,MP1rs_col] - Y_with_imputed[ni,MP1cs_col] ~ normal(
			intercepts[2] + 
				betas[4]*Y_with_imputed[ni,age_col] + 
				betas[5]*MP1ds +
				betas[6]*Y_with_imputed[ni,age_col]*MP1ds
			, sigmas[2]
		) ;
	}
}
generated quantities{
	vector[N] log_lik ;
	matrix[N,K] Y_rep ;
	for(ni in 1:N){
		log_lik[ni] = multi_normal_lpdf(transpose(Y_with_imputed[ni,])|means,cov) ;
		Y_rep[ni,] = transpose(multi_normal_rng(means,cov)) ;
	}
}
